# Supplementary material for: Use of Germline BRCA Testing in Patients With Ovarian Cancer and Commercial Insurance
Source: PubMed Central journal article supplement (PMC8753497; doi:10.1001/jamanetworkopen.2021.42703), 2022-01-11
Supplement: jamanetwopen-e2142703-s001.pdf [file jamanetwopen-e2142703-s001.pdf]

## Supplemental Online Content

Cham S, Landrum MB, Keating NL, Armstrong J, Wright AA. Use of germline *BRCA* testing in patients with ovarian cancer and commercial insurance. *JAMA Netw Open*. 2022;5(1):e2142703. doi:10.1001/jamanetworkopen.2021.42703

**eFigure.** Flowchart of Cohort With Incident Diagnosis of Ovarian Cancer

**eAppendix.** Assigning Patients to Practice and Physicians

**eTable.** Codes Used for Cohort and Genetic Screening

This supplemental material has been provided by the authors to give readers additional information about their work.

eFigure. Flowchart of Cohort With Incident Diagnosis of Ovarian Cancer

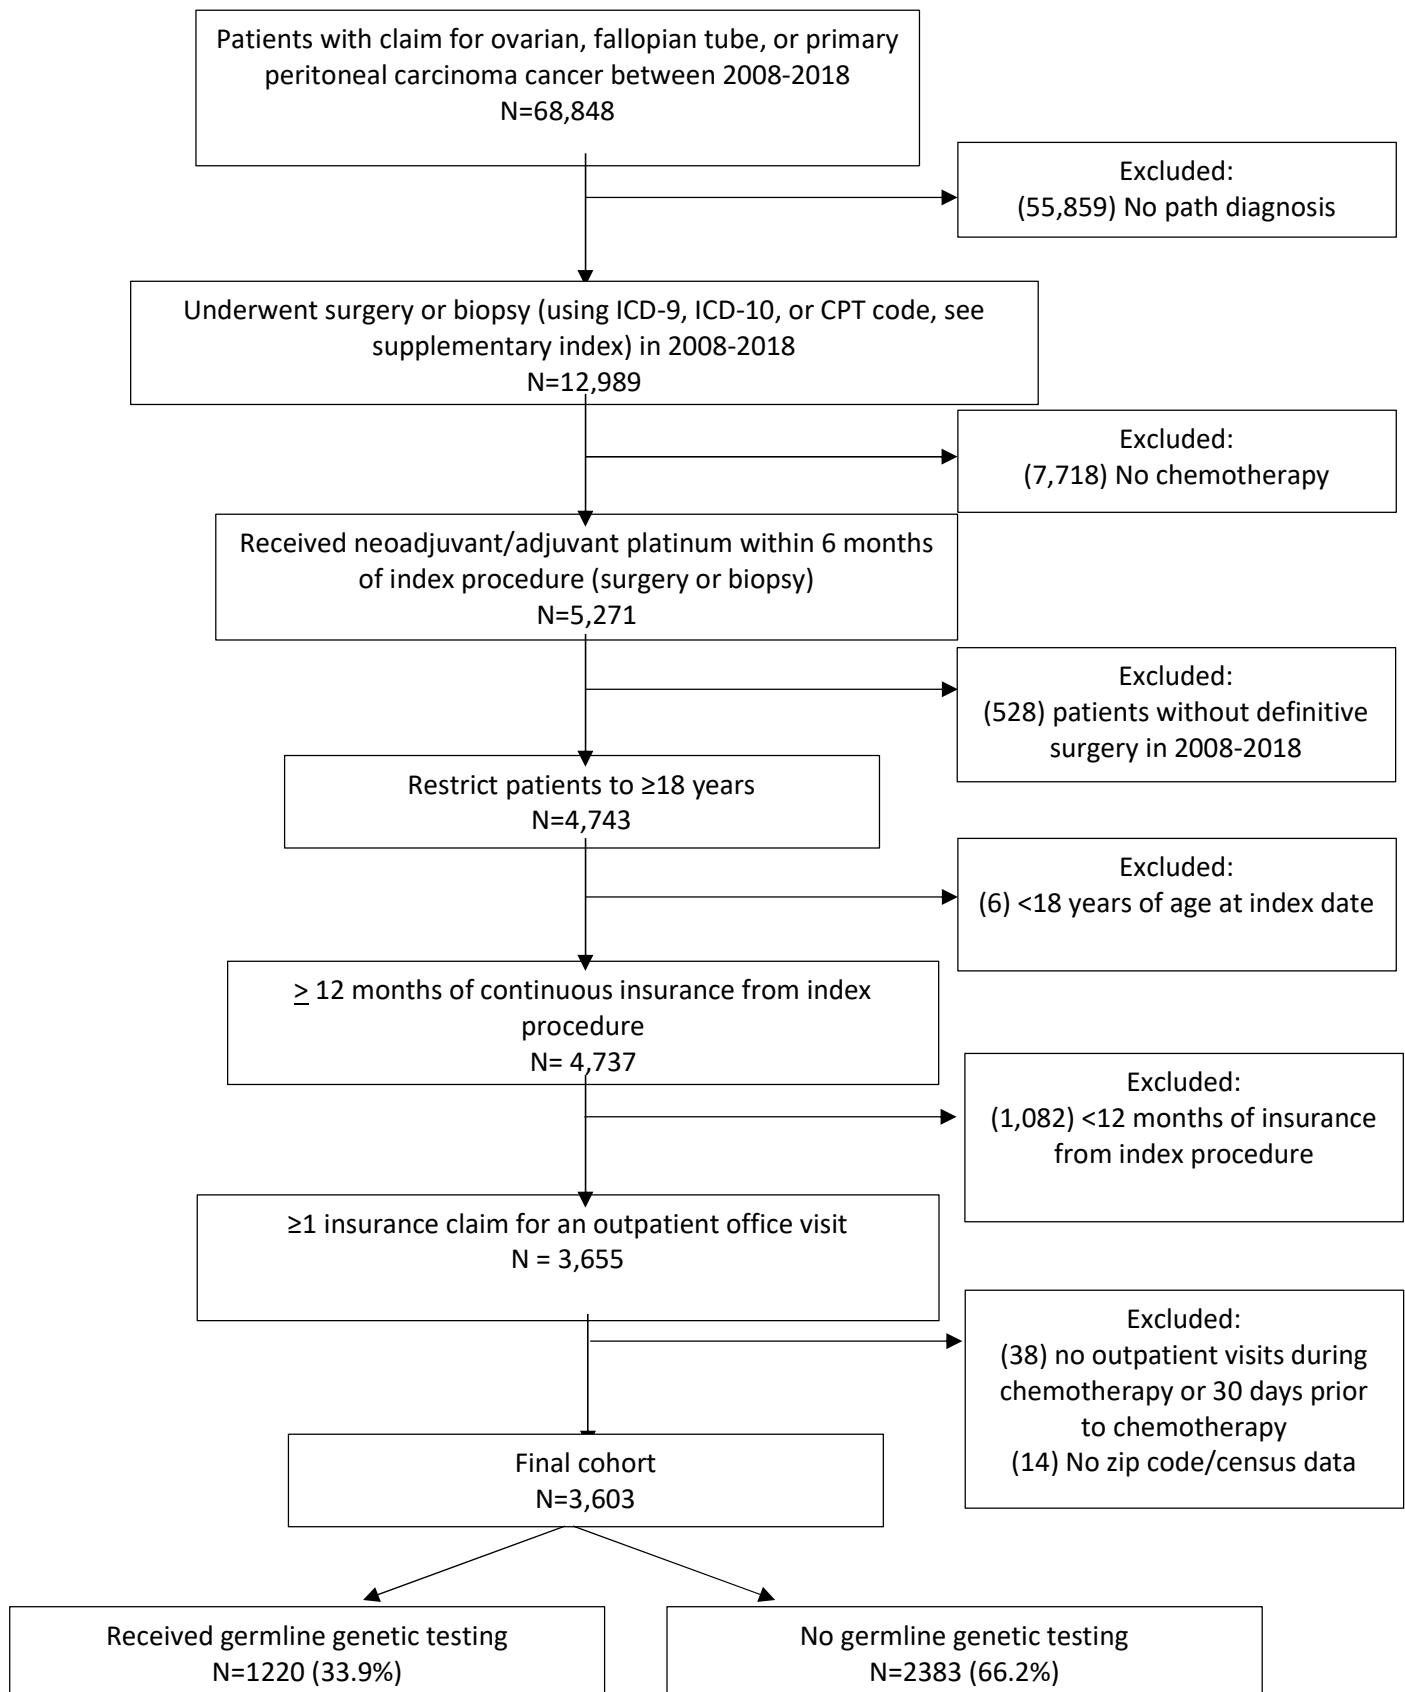

## eAppendix. Assigning Patients to Practice and Physicians

We attributed patients to physicians based upon outpatient evaluation and management (E&M) claims with a cancer diagnosis within 6 months of the first outpatient claim for infused chemotherapy. Patients were attributed to practices according to the Tax Identification Number with the largest number of E&M visits within the first 6 months after the first chemotherapy claim. We assigned patients to physicians seen during these E&M visits according to the following categories based upon the variable “Servicing Provider Specialty” codes on the claim: gynecologic oncologists (20103, 2OGON), medical oncology (10311, 10315, 10316, 10309, 2ON or 2H). Patients were assigned to the practice and physicians with the most oncology visits in the 30 days prior to receipt of chemotherapy.

Patients without any visits to a medical or gynecological oncologist were assigned to the practice and physician with the most non-oncology visits. We attempted to match non-oncology physicians to a database of health systems, hospitals, and providers and recategorized physicians if this database indicated the physician specialty was medical or gynecological oncology.<sup>1</sup> The database includes data from the National Plan and Provider Enumeration System (NPPES), Medicare Data on Provider Practice and Specialty (MD-PPAS), Centers for Medicare & Medicaid Services (CMS) Physician Compare, IQVIA, and commercial claims that were combined to classify a specialty for each physician in the database. To code physician specialty uniformly, researchers at the National Bureau of Economic Research developed a physician specialty taxonomy based on board certifications offered by the American Board of Medical Specialties (ABMS) and mapped specialty classifications in each of the input data sets to the taxonomy.

---

<sup>1</sup> National Bureau of Economic Research. Health Systems and Provider Database. Accessed at <https://www.nber.org/programs-projects/projects-and-centers/measuring-clinical-and-economic-outcomes-associated-delivery-systems/health-systems-and-provider-database-hspd-methodology-data-resources> on March 24, 2021.

**eTable. Codes Used for Cohort and Genetic Screening**

| <b>Ovarian, peritoneal, fallopian tube diagnosis codes</b> |                                                                     |
|------------------------------------------------------------|---------------------------------------------------------------------|
| <u>ICD-9 Codes</u>                                         |                                                                     |
| Ovarian cancer and fallopian                               | 183.x                                                               |
| Peritoneal cancer                                          | 158.8, 158.9                                                        |
| <u>ICD-10 Code</u>                                         |                                                                     |
| Ovarian cancer                                             | C56.x                                                               |
| Fallopian tube cancer                                      | C57.0x                                                              |
| Peritoneal cancer                                          | C48.1, C48.2, C48.8                                                 |
| <b>Chemotherapy codes</b>                                  |                                                                     |
| <u>J codes</u>                                             |                                                                     |
| Carboplatin                                                | J9045                                                               |
| Cisplatin                                                  | J9060, J9062                                                        |
| <b>Surgery codes</b>                                       |                                                                     |
| <u>ICD-9 Code</u>                                          |                                                                     |
| 54.4                                                       | Omentectomy, excision, destruction peritoneal tissue                |
| 65.2                                                       | Wedge resection or partial excision of ovary                        |
| 65.3x                                                      | Unilateral oophorectomy                                             |
| 65.4x                                                      | Bilateral oophorectomy                                              |
| 65.6x                                                      | Bilateral salpingo-oophorectomy                                     |
| 68.8                                                       | Pelvic exenteration                                                 |
| 68.3-68.7, 68.9, 68.59                                     | Hysterectomy                                                        |
| 70.32                                                      | Excision/destruction cul de sac lesion                              |
| <u>ICD-10 Code</u>                                         |                                                                     |
| 0D5U0ZZ                                                    | Destruction of Omentum, Open Approach                               |
| 0D5U3ZZ                                                    | Destruction of Omentum, Percutaneous Approach                       |
| 0D5U4ZZ                                                    | Destruction of Omentum, Percutaneous Endoscopic Approach            |
| 0UT04ZZ                                                    | Resection of Right Ovary, Percutaneous Endoscopic Approach          |
| 0UT14ZZ                                                    | Resection of Left Ovary, Percutaneous Endoscopic Approach           |
| 0UT54ZZ                                                    | Resection of Right Fallopian Tube, Percutaneous Endoscopic Approach |
| 0UT64ZZ                                                    | Resection of Left Fallopian Tube, Percutaneous Endoscopic Approach  |
| 0UT20ZZ                                                    | Resection of Bilateral Ovaries, Open Approach                       |
| 0UT27ZZ                                                    | Resection of Bilateral Ovaries, Via Natural or Artificial Opening   |

|                 |                                                                                                                   |
|-----------------|-------------------------------------------------------------------------------------------------------------------|
| 0UT28ZZ         | Resection of Bilateral Ovaries, Via Natural or Artificial Opening Endoscopic                                      |
| 0UT2FZZ         | Resection of Bilateral Ovaries, Via Natural or Artificial Opening With Percutaneous Endoscopic Assistance         |
| 0UT70ZZ         | Resection of Bilateral Fallopian Tubes, Open Approach                                                             |
| 0UT77ZZ         | Resection of Bilateral Fallopian Tubes, Via Natural or Artificial Opening                                         |
| 0UT78ZZ         | Resection of Bilateral Fallopian Tubes, Via Natural or Artificial Opening Endoscopic                              |
| 0UT7FZZ         | Resection of Bilateral Fallopian Tubes, Via Natural or Artificial Opening With Percutaneous Endoscopic Assistance |
| 0UT94ZL         | Resection of Uterus, Supracervical, Percutaneous Endoscopic Approach                                              |
| 0UT90ZL         | Resection of Uterus, Supracervical, Open Approach                                                                 |
| 0UT90ZL         | Resection of Uterus, Supracervical, Open Approach                                                                 |
| 0UT90ZZ         | Resection of Uterus, Open Approach                                                                                |
| 0UT94ZZ         | Resection of Uterus, Percutaneous Endoscopic Approach                                                             |
| 0UT97ZZ         | Resection of Uterus, Via Natural or Artificial Opening                                                            |
| 0UT98ZZ         | Resection of Uterus, Via Natural or Artificial Opening Endoscopic                                                 |
| 0UTC0ZZ         | Resection of Cervix, Open Approach                                                                                |
| 0UTC4ZZ         | Resection of Cervix, Percutaneous Endoscopic Approach                                                             |
| 0UTC7ZZ         | Resection of Cervix, Via Natural or Artificial Opening                                                            |
| 0UTC8ZZ         | Resection of Cervix, Via Natural or Artificial Opening Endoscopic                                                 |
| 0U5F0ZZ         | Destruction of Cul-de-sac, Open Approach                                                                          |
| 0U5F3ZZ         | Destruction of Cul-de-sac, Percutaneous Approach                                                                  |
| 0U5F4ZZ         | Destruction of Cul-de-sac, Percutaneous Endoscopic Approach                                                       |
| 0U5F7ZZ         | Destruction of Cul-de-sac, Via Natural or Artificial Opening                                                      |
| 0U5F8ZZ         | Destruction of Cul-de-sac, Via Natural or Artificial Opening Endoscopic                                           |
| 0UBF0ZZ         | Excision of Cul-de-sac, Open Approach                                                                             |
| 0UBF3ZZ         | Excision of Cul-de-sac, Percutaneous Approach                                                                     |
| 0UBF4ZZ         | Excision of Cul-de-sac, Percutaneous Endoscopic Approach                                                          |
| 0UBF7ZZ         | Excision of Cul-de-sac, Via Natural or Artificial Opening                                                         |
| 0UBF8ZZ         | Excision of Cul-de-sac, Via Natural or Artificial Opening Endoscopic                                              |
|                 |                                                                                                                   |
| <u>CPT Code</u> |                                                                                                                   |
| 56303           | Laparoscopy with excision of ovary or peritoneum                                                                  |
| 56307           | Laparoscopic oophorectomy +/- salpingectomy                                                                       |
| 56308           | Laparoscopy and vaginal hysterectomy +/- salpingo-oophorectomy                                                    |
| 57531           | Para-aortic lymph node sampling +/- salpingo-oophorectomy                                                         |
| 58150           | TAH +/- salpingo-oophorectomy                                                                                     |
| 58152           | TAH with colpo-urethrocytopexy +/- salpingo-oophorectomy                                                          |
| 58180           | Subtotal hysterectomy +/- salpingo-oophorectomy                                                                   |
| 58200           | TAH with para-aortic and pelvic lymph node sampling +/- salpingo-oophorectomy                                     |

|                     |                                                                                                                                                                                                                                                                              |
|---------------------|------------------------------------------------------------------------------------------------------------------------------------------------------------------------------------------------------------------------------------------------------------------------------|
| 58210               | Radical Hysterectomy                                                                                                                                                                                                                                                         |
| 58240               | Pelvic exenteration, including colostomy                                                                                                                                                                                                                                     |
| 58262               | Vaginal Hysterectomy +/- salpingo-oophorectomy                                                                                                                                                                                                                               |
| 58263               | Vaginal Hysterectomy with repair of enterocele +/- salpingo-oophorectomy                                                                                                                                                                                                     |
| 58720               | Salpingo-oophorectomy, complete or partial, unilateral or bilateral                                                                                                                                                                                                          |
| 58920               | Wedge resection of ovary                                                                                                                                                                                                                                                     |
| 58940               | Oophorectomy, partial or total, unilateral or bilateral                                                                                                                                                                                                                      |
| 58943               | Oophorectomy, partial or total, unilateral or bilateral; for ovarian malignancy, with para-aortic and pelvic lymph node biopsies, peritoneal washings, peritoneal biopsies, diaphragmatic assessment, with or without salpingectomy(s), with or without omentectomy          |
| 58950               | Resection of ovarian malignancy with bilateral salpingo-oophorectomy and omentectomy                                                                                                                                                                                         |
| 58951               | Resection of ovarian malignancy with bilateral salpingo-oophorectomy and omentectomy, with abdominal hysterectomy, pelvic and limited para-aortic lymphadenectomy)                                                                                                           |
| 58952               | Resection of ovarian malignancy with bilateral salpingo-oophorectomy and omentectomy, with radical dissection for debulking                                                                                                                                                  |
| 58953               | Bilateral salpingo-oophorectomy with omentectomy, total abdominal hysterectomy and radical dissection for debulking                                                                                                                                                          |
| 58954               | Bilateral salpingo-oophorectomy with omentectomy, total abdominal hysterectomy and radical dissection for debulking, with pelvic lymphadenectomy and limited para-aortic lymphadenectomy)                                                                                    |
| 58960               | Laparotomy for staging or restaging of ovarian, tubal or primary peritoneal malignancy (second look) with or without omentectomy, peritoneal washing, biopsy of abdominal and pelvic peritoneum, diaphragmatic assessment with pelvic and limited per-aortic lymphadenectomy |
|                     |                                                                                                                                                                                                                                                                              |
| <b>Biopsy codes</b> |                                                                                                                                                                                                                                                                              |
| <u>ICD-9 Codes</u>  |                                                                                                                                                                                                                                                                              |
| 54.24               | percutaneous needle biopsy of abdominal mass                                                                                                                                                                                                                                 |
| 50.11               | percutaneous needle biopsy of liver                                                                                                                                                                                                                                          |
| 34.91               | Thoracentesis                                                                                                                                                                                                                                                                |
| 40.1x-40.2          | lymph node excision or biopsy                                                                                                                                                                                                                                                |
| 54.22               | biopsy of abdominal wall/mass                                                                                                                                                                                                                                                |
| 54.23               | biopsy of peritoneum                                                                                                                                                                                                                                                         |
|                     | Percutaneous abdominal drainage                                                                                                                                                                                                                                              |
| 54.91               |                                                                                                                                                                                                                                                                              |
| 65.1x               | operations on ovary (see above)                                                                                                                                                                                                                                              |
|                     |                                                                                                                                                                                                                                                                              |
| <u>ICD-10 Codes</u> |                                                                                                                                                                                                                                                                              |
| 0W9G30Z             | Drainage of Peritoneal Cavity with Drainage Device, Percutaneous Approach                                                                                                                                                                                                    |
| 0W9G3ZX             | Drainage of Peritoneal Cavity, Percutaneous Approach, Diagnostic                                                                                                                                                                                                             |

|         |                                                                                      |
|---------|--------------------------------------------------------------------------------------|
| 0W9G3ZZ | Drainage of Peritoneal Cavity, Percutaneous Approach                                 |
| 0FB03ZX | Excision of Liver, Percutaneous Approach, Diagnostic                                 |
| 0FB13ZX | Excision of Right Lobe Liver, Percutaneous Approach, Diagnostic                      |
| 0FB23ZX | Excision of Left Lobe Liver, Percutaneous Approach, Diagnostic                       |
| 0FD03ZX | Extraction of Liver, Percutaneous Approach, Diagnostic                               |
| 0W993ZZ | Drainage of Right Pleural Cavity, Percutaneous Approach                              |
| 0W9B3ZZ | Drainage of Left Pleural Cavity, Percutaneous Approach                               |
| 07BH3ZZ | Excision of Right Inguinal Lymphatic, Percutaneous Approach                          |
| 07BJ4ZZ | Excision of Left Inguinal Lymphatic, Percutaneous Endoscopic Approach                |
| 07BC3ZX | Excision of Pelvis Lymphatic, Percutaneous Approach, Diagnostic                      |
| 07BC4ZX | Excision of Pelvis Lymphatic, Percutaneous Endoscopic Approach, Diagnostic           |
| 07BD3ZX | Excision of Aortic Lymphatic, Percutaneous Approach, Diagnostic                      |
| 07BD4ZX | Excision of Aortic Lymphatic, Percutaneous Endoscopic Approach, Diagnostic           |
| 07DH3ZX | Extraction of Right Inguinal Lymphatic, Percutaneous Approach, Diagnostic            |
| 07DH4ZX | Extraction of Right Inguinal Lymphatic, Percutaneous Endoscopic Approach, Diagnostic |
| 07DJ3ZX | Extraction of Left Inguinal Lymphatic, Percutaneous Approach, Diagnostic             |
| 07DJ4ZX | Extraction of Left Inguinal Lymphatic, Percutaneous Endoscopic Approach,             |
| 07DC3ZX | Extraction of Pelvis Lymphatic, Percutaneous Approach, Diagnostic                    |
| 07DC4ZX | Extraction of Pelvis Lymphatic, Percutaneous Endoscopic Approach, Diagnostic         |
| 07DD3ZX | Extraction of Aortic Lymphatic, Percutaneous Approach, Diagnostic                    |
| 07DD4ZX | Extraction of Aortic Lymphatic, Percutaneous Endoscopic Approach, Diagnostic         |
| 0WBF3ZX | Excision of Abdominal Wall, Percutaneous Approach, Diagnostic                        |
| 0WBF4ZX | Excision of Abdominal Wall, Percutaneous Endoscopic Approach, Diagnostic             |
| 0WBFXZX | Excision of Abdominal Wall, External Approach, Diagnostic                            |
| 0DBU3ZX | Excision of Omentum, Percutaneous Approach, Diagnostic                               |
| 0DBU4ZX | Excision of Omentum, Percutaneous Endoscopic Approach, Diagnostic                    |
| 0DBW3ZX | Excision of Peritoneum, Percutaneous Approach, Diagnostic                            |
| 0DBW4ZX | Excision of Peritoneum, Percutaneous Endoscopic Approach, Diagnostic                 |
| 0WBF0ZX | Excision of Abdominal Wall, Open Approach, Diagnostic                                |
| 0WBF3ZX | Excision of Abdominal Wall, Percutaneous Approach, Diagnostic                        |
| 0WBF4ZX | Excision of Abdominal Wall, Percutaneous Endoscopic Approach, Diagnostic             |
| 0UB04ZX | Excision of Right Ovary, Percutaneous Endoscopic Approach, Diagnostic                |
| 0UB08ZX | Excision of Right Ovary, Via Natural or Artificial Opening Endoscopic, Diagnostic    |
| 0UB14ZX | Excision of Left Ovary, Percutaneous Endoscopic Approach, Diagnostic                 |
| 0UB18ZX | Excision of Left Ovary, Via Natural or Artificial Opening Endoscopic, Diagnostic     |
| 07TC0   | Resection, lymphatic pelvis                                                          |
| 07TD0   | Resection, lymphatic aortic                                                          |
| -       |                                                                                      |

|                                                          |                                                                                                                                                                                                                                                     |
|----------------------------------------------------------|-----------------------------------------------------------------------------------------------------------------------------------------------------------------------------------------------------------------------------------------------------|
| <u>CPT codes</u>                                         |                                                                                                                                                                                                                                                     |
| 10021-10022                                              | FNA/biopsy procedures                                                                                                                                                                                                                               |
| 76942                                                    | ultrasound guided procedure                                                                                                                                                                                                                         |
| 32400                                                    | biopsy pleura percutaneous                                                                                                                                                                                                                          |
| 47000-47001                                              | incision/procedures of the liver                                                                                                                                                                                                                    |
| 49082                                                    | Abdominal paracentesis (diagnostic or therapeutic) w/o imaging guidance                                                                                                                                                                             |
| 49083                                                    | Abdominal paracentesis (diagnostic or therapeutic) w/ imaging guidance                                                                                                                                                                              |
| 49180                                                    | Excision and Destruction Procedures on the Abdomen, Peritoneum, and Omentum                                                                                                                                                                         |
|                                                          |                                                                                                                                                                                                                                                     |
| <b>Genetic Screening Codes</b>                           |                                                                                                                                                                                                                                                     |
| Gene specific codes (introduced in 2012, currently used) |                                                                                                                                                                                                                                                     |
| <u>CPT Codes</u>                                         | <u>Description</u>                                                                                                                                                                                                                                  |
| 81162                                                    | BRCA1 (BRCA1, DNA repair associated), BRCA2 (BRCA2, DNA repair associated) (e.g., hereditary breast and ovarian cancer) gene analysis; full sequence analysis and full duplication/deletion analysis (i.e., detection of large gene rearrangements) |
| 81163                                                    | BRCA1 (BRCA1, DNA repair associated), BRCA2 (BRCA2, DNA repair associated) (e.g., hereditary breast and ovarian cancer) gene analysis; full sequence analysis                                                                                       |
| 81164                                                    | BRCA1 (BRCA1, DNA repair associated), BRCA2 (BRCA2, DNA repair associated) (e.g., hereditary breast and ovarian cancer) gene analysis; full duplication/deletion analysis (i.e., detection of large gene rearrangements)                            |
| 81165                                                    | BRCA1 (BRCA1, DNA repair associated) (e.g., hereditary breast and ovarian cancer) gene analysis; full sequence analysis                                                                                                                             |
| 81166                                                    | BRCA1 (BRCA1, DNA repair associated) (e.g., hereditary breast and ovarian cancer) gene analysis; full duplication/deletion analysis (i.e., detection of large gene rearrangements)                                                                  |
| 81167                                                    | BRCA2 (BRCA2, DNA repair associated) (e.g., hereditary breast and ovarian cancer) gene analysis; full duplication/deletion analysis (i.e., detection of large gene rearrangements)                                                                  |
| 81211                                                    | BRCA1, BRCA2 gene analysis; full sequence analysis and common duplication/deletion variants in BRCA1 (i.e., exon 13 del 3.835 kb, exon 13 dup 6 kb, exon 14-20 del 26 kb, exon 22 del 510 bp, exon 8-9 del 7.1 kb)                                  |
| 81212                                                    | BRCA1 (BRCA1, DNA repair associated), BRCA2 (BRCA2, DNA repair associated) (e.g., hereditary breast and ovarian cancer) gene analysis; 185delAG, 5385insC, 6174delT variants                                                                        |
| 81213                                                    | BRCA1, BRCA2 gene analysis; uncommon duplication/deletion variants                                                                                                                                                                                  |
| 81214                                                    | BRCA1 gene analysis; full sequence analysis and common duplication/deletion variant                                                                                                                                                                 |



|                                             |                                                                                                                                                                                                                                                                                                                             |
|---------------------------------------------|-----------------------------------------------------------------------------------------------------------------------------------------------------------------------------------------------------------------------------------------------------------------------------------------------------------------------------|
| 81215                                       | BRCA1 (BRCA1, DNA repair associated) (e.g., hereditary breast and ovarian cancer) gene analysis; known familial variant                                                                                                                                                                                                     |
| 81216                                       | BRCA2 (BRCA2, DNA repair associated) (e.g., hereditary breast and ovarian cancer) gene analysis; full sequence analysis                                                                                                                                                                                                     |
| 81217                                       | BRCA2 (BRCA2, DNA repair associated) (e.g., hereditary breast and ovarian cancer) gene analysis; known familial variant                                                                                                                                                                                                     |
| 81432                                       | Hereditary breast cancer-related disorders (e.g., hereditary breast cancer, hereditary ovarian cancer, hereditary endometrial cancer); genomic sequence analysis panel, must include sequencing of at least 14 genes, including ATM, BRCA1, BRCA2, BRIP1, CDH1, MLH1, MSH2, MSH6, NBN, PALB2, PTEN, RAD51C, STK11, and TP53 |
| 81433                                       | Hereditary breast cancer-related disorders (e.g., hereditary breast cancer, hereditary ovarian cancer, hereditary endometrial cancer); duplication/deletion analysis panel, must include analyses for BRCA1, BRCA2, MLH1, MSH2, and STK11                                                                                   |
| <u>Methodology based codes (until 2013)</u> |                                                                                                                                                                                                                                                                                                                             |
| 83891                                       | Molecular diagnostics; isolation or extraction of highly purified nucleic acid, each nucleic acid type (i.e., DNA or RNA)                                                                                                                                                                                                   |
| 83898                                       | Molecular diagnostics; amplification, target, each nucleic acid sequence                                                                                                                                                                                                                                                    |
| 83904                                       | Molecular diagnostics; mutation identification by sequencing, single segment, each segment                                                                                                                                                                                                                                  |
| 83909                                       | Molecular diagnostics; separation and identification by high-resolution technique (e.g., capillary electrophoresis), each nucleic acid preparation                                                                                                                                                                          |
| 83912                                       | Molecular diagnostics; interpretation and report                                                                                                                                                                                                                                                                            |
| <u>HCPCS S codes (until 2013)</u>           |                                                                                                                                                                                                                                                                                                                             |
| S3818                                       | Complete gene sequence analysis; BRCA1 gene                                                                                                                                                                                                                                                                                 |
| S3819                                       | Complete gene sequence analysis; BRCA2 gene                                                                                                                                                                                                                                                                                 |
| S3820                                       | Complete BRCA1 and BRCA2 gene sequence analysis for susceptibility to breast and ovarian cancer                                                                                                                                                                                                                             |
| S3822                                       | Single mutation analysis (in individual with a known BRCA1 or BRCA2 mutation in the family) for susceptibility to breast and ovarian cancer                                                                                                                                                                                 |
| S3823                                       | Three-mutation BRCA1 and BRCA2 analysis for susceptibility to breast and ovarian cancer in Ashkenazi individuals                                                                                                                                                                                                            |
